# Supplementary material for: Producing human ceramide-NS by metabolic engineering using yeast Saccharomyces cerevisiae
Source: PubMed Central journal article supplement (PMC4647206; doi:10.1038/srep16319), 2015-11-17
Supplement: srep16319-s1.pdf [file srep16319-s1.pdf]

**Supplementary information for**  
**“Producing human ceramide-NS by metabolic engineering using yeast *Saccharomyces cerevisiae*”**

Table S1. Plasmids used in this study.

| Name                           | Relevant information                        | Source                                                                |
|--------------------------------|---------------------------------------------|-----------------------------------------------------------------------|
| pRS426                         | 2 $\mu$ , GPD promoter, <i>URA3</i>         | Mumberg et al., Gene (1995) 156, 119-22                               |
| pRS426- <i>hDES1</i>           | 2 $\mu$ , GPD promoter, <i>URA3</i>         | This study                                                            |
| pRS426-2HA- <i>hDES1</i>       | 2 $\mu$ , GPD promoter, <i>URA3</i>         | This study                                                            |
| pRS426-GFP- <i>hDES1</i>       | 2 $\mu$ , GPD promoter, <i>URA3</i>         | This study                                                            |
| pRS426- <i>hDES1</i> -KKEK     | 2 $\mu$ , GPD promoter, <i>URA3</i>         | This study                                                            |
| pRS426-GFP- <i>hDES1</i> -KKEK | 2 $\mu$ , GPD promoter, <i>URA3</i>         | This study                                                            |
| pRS426- <i>SpDSD1</i>          | 2 $\mu$ , GPD promoter, <i>URA3</i>         | This study                                                            |
| pRS426- <i>mDES1</i>           | 2 $\mu$ , GPD promoter, <i>URA3</i>         | This study                                                            |
| pRS426- <i>mDES2</i>           | 2 $\mu$ , GPD promoter, <i>URA3</i>         | This study                                                            |
| pRS426- <i>ScSUR2</i>          | 2 $\mu$ , GPD promoter, <i>URA3</i>         | This study                                                            |
| pRS424                         | 2 $\mu$ , GPD promoter, <i>TRP1</i>         | Mumberg et al., Gene (1995) 156, 119-22                               |
| pRS424- <i>ScLAC1</i>          | 2 $\mu$ , GPD promoter, <i>TRP1</i>         | This study                                                            |
| pRS423                         | 2 $\mu$ , GPD promoter, <i>HIS3</i>         | Mumberg et al., Gene (1995) 156, 119-22                               |
| pRS423- <i>ScLAG1</i>          | 2 $\mu$ , GPD promoter, <i>HIS3</i>         | This study                                                            |
| pYE22m                         | 2 $\mu$ , <i>TDH3</i> promoter, <i>TRP1</i> | Sawai-Hatanaka et al., Biosci. Biotechnol. Biochem. (1995) 59, 1221-8 |
| pYE22m- <i>ScISC1</i>          | 2 $\mu$ , <i>TDH3</i> promoter, <i>TRP1</i> | This study                                                            |

Table S2. Strains used in this study.

| Name            | Genotype                                                                         | Source or Reference                               | Figure                     |
|-----------------|----------------------------------------------------------------------------------|---------------------------------------------------|----------------------------|
| RH6082 (FKY113) | <i>MATa ura3, his3, leu2, lys2, trp1, bar1-1</i>                                 | Kajiwara et al., Mol Biol Cell (2008) 19, 2069-82 | 1B-C, 2A-B, 4A-B, 5A-C     |
| FKY268          | <i>MATa sur2Δ::LEU2, ura3, his3, leu2, lys2, trp1, bar1-1</i>                    | Ikeda et al., J. Cell Sci. (2015) 1282, 2454-67   | 1B-C, 2A-C, 3A, 4A-B, 5A-C |
| FKY277          | <i>MATa scs7Δ::ura3 sur2Δ::LEU2 ura3 his3 leu2 lys2 trp1 bar1-1</i>              | This study                                        | 1B-C, 2C-E, 3A-B           |
| FKY300          | <i>MATa scs7Δ::KanMX sur2Δ::LEU2 ura3 his3 leu2 lys2 trp1 bar1-1</i>             | This study                                        | 3C, 4A-B, 5B-E             |
| FKY301          | <i>MATa scs7Δ::KanMX sur2Δ::LEU2 ydc1Δ::HIS3 ura3 his3 leu2 lys2 trp1 bar1-1</i> | This study                                        | 3C                         |
